# Supplementary material for: Effect of Al and Fe Doping on the Electrochemical Behavior of Li1.2Ni0.133Mn0.534Co0.133O2 Li-Rich Cathode Material
Source: MDPI journal article supplement (doi:10.3390/ma15228225), 2022-11-19
Supplement: s1 [file s1]

## Supplementary materials

# Effect of Al and Fe Doping on the Electrochemical Behavior of $\text{Li}_{1.2}\text{Ni}_{0.133}\text{Mn}_{0.534}\text{Co}_{0.133}\text{O}_2$ Li-Rich Cathode Material

Anna Medvedeva <sup>1,\*</sup>, Elena Makhonina <sup>1</sup>, Lidia Pechen <sup>1</sup>, Yury Politov <sup>1</sup>, Aleksander Rumyantsev <sup>2</sup>, Yury Koshtyal <sup>2</sup>, Alexander Goloveshkin <sup>3</sup>, Konstantin Maslakov <sup>4</sup> and Igor Eremenko <sup>1,\*</sup>

<sup>1</sup> Kurnakov Institute of General and Inorganic Chemistry of the Russian Academy of Sciences, 31 Leninsky pr., 119991 Moscow, Russia

<sup>2</sup> Ioffe Institute of the Russian Academy of Sciences, 26 Politekhnicheskaya ul., 194021 St. Petersburg, Russia

<sup>3</sup> A.N. Nesmeyanov Institute of Organoelement Compounds of the Russian Academy of Sciences, 28 Vavilova ul., 119334 Moscow, Russia

<sup>4</sup> Department of Chemistry, Lomonosov Moscow State University, Leninskiye Gory, 1/3, 119991 Moscow, Russia

\* Correspondence: anna.ev.medvedeva@gmail.com (A.M.); ilerem@igic.ras.ru (I.E.); Tel.: +7-495-952-07-87 (A.M.)

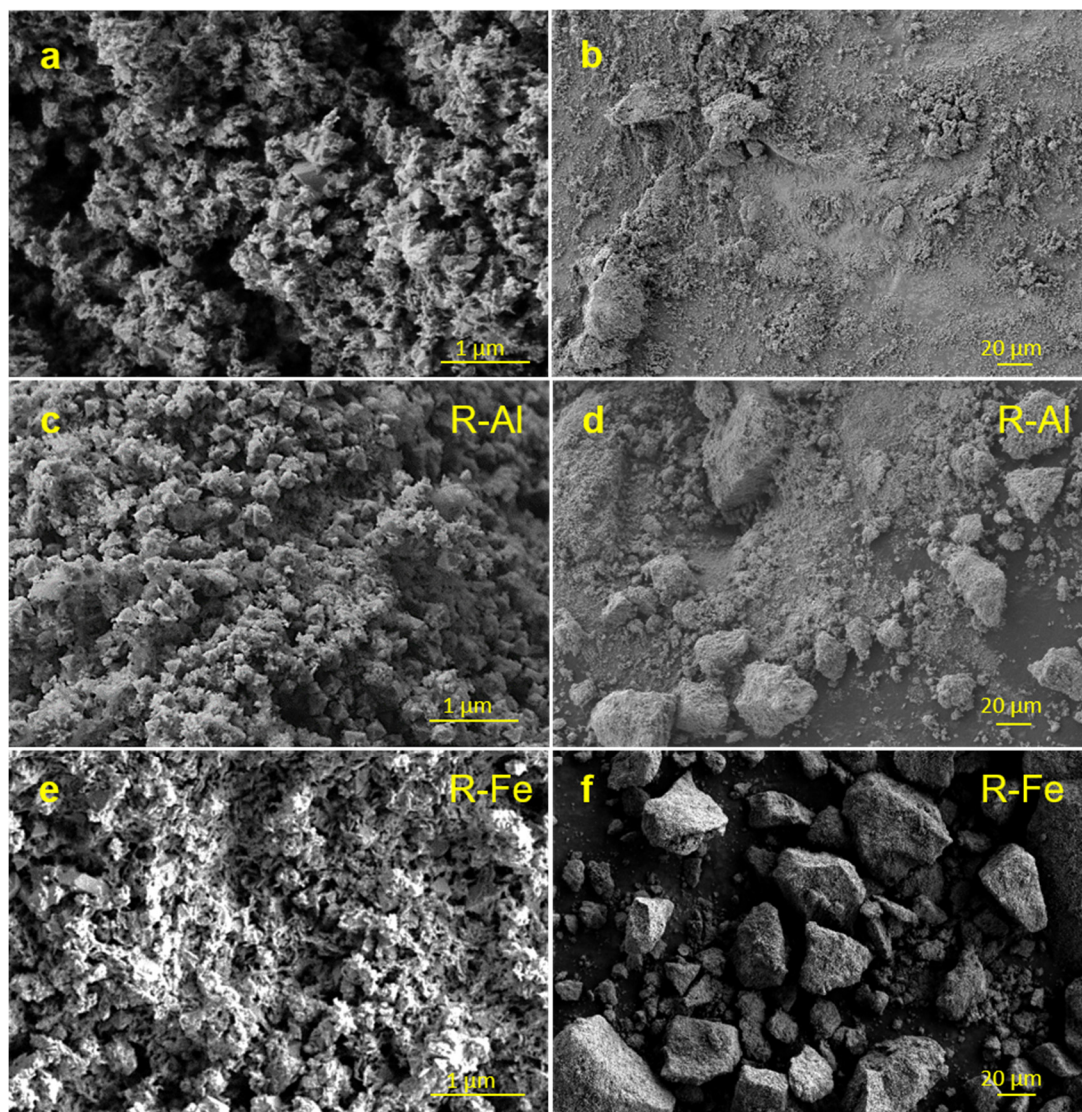

Figure S1. SEM micrographs of (a, b) R, (c, d) R – Al, and (e, f) R – Fe samples.

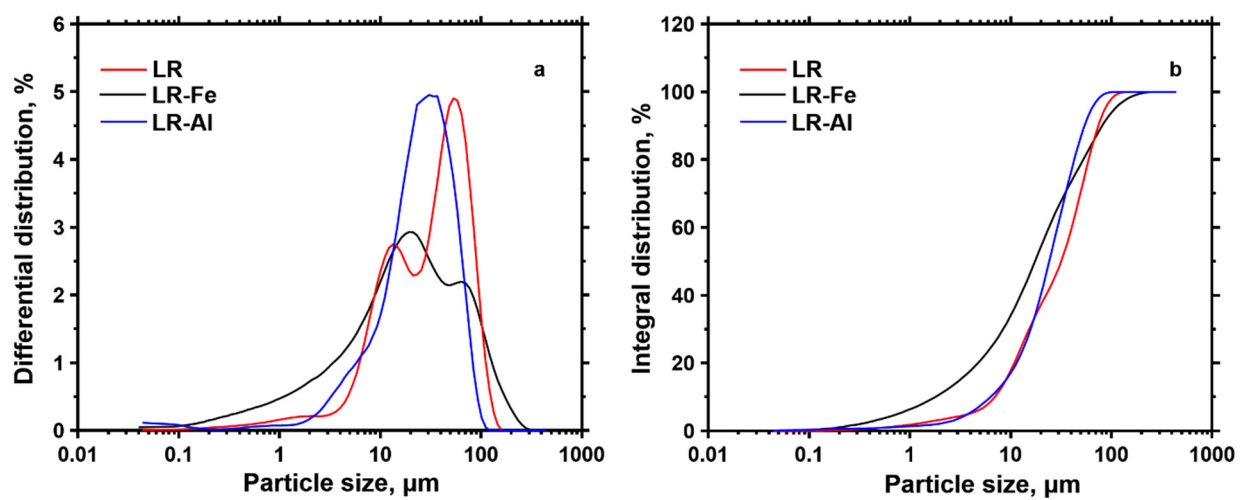

Figure S2. Differential and integral size distribution curves of agglomerates of the synthesized samples.



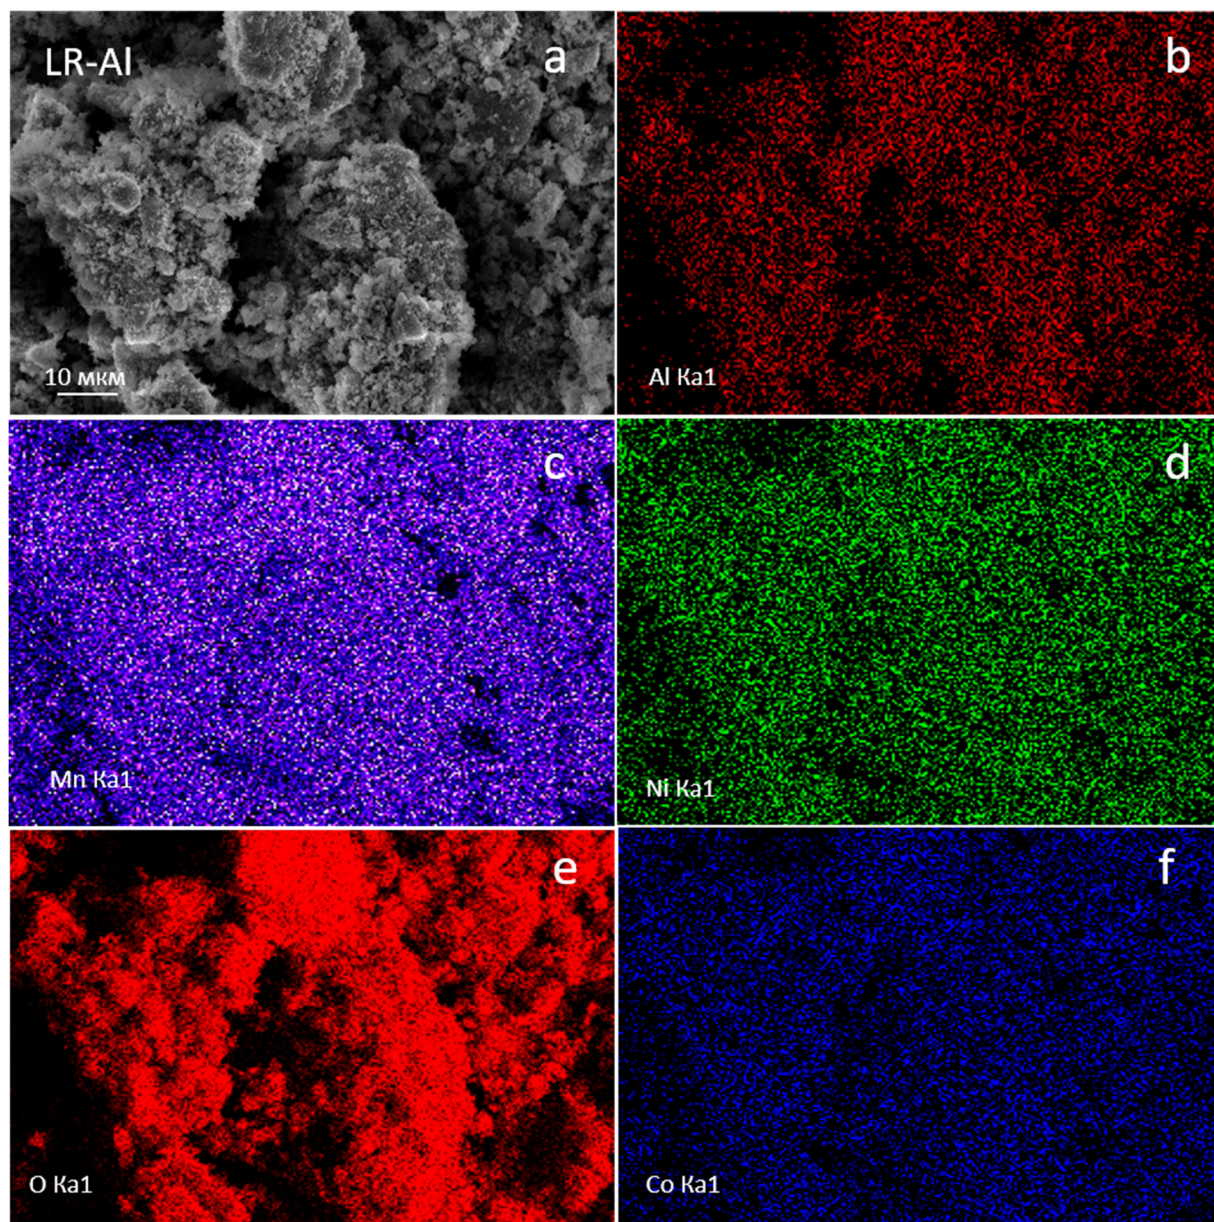

Figure S3. (a) SEM micrograph of LR – Al sample and (b-f) the element distribution maps: (b) Al, (c) Mn, (d) Ni, (e) O, and (f) Co.



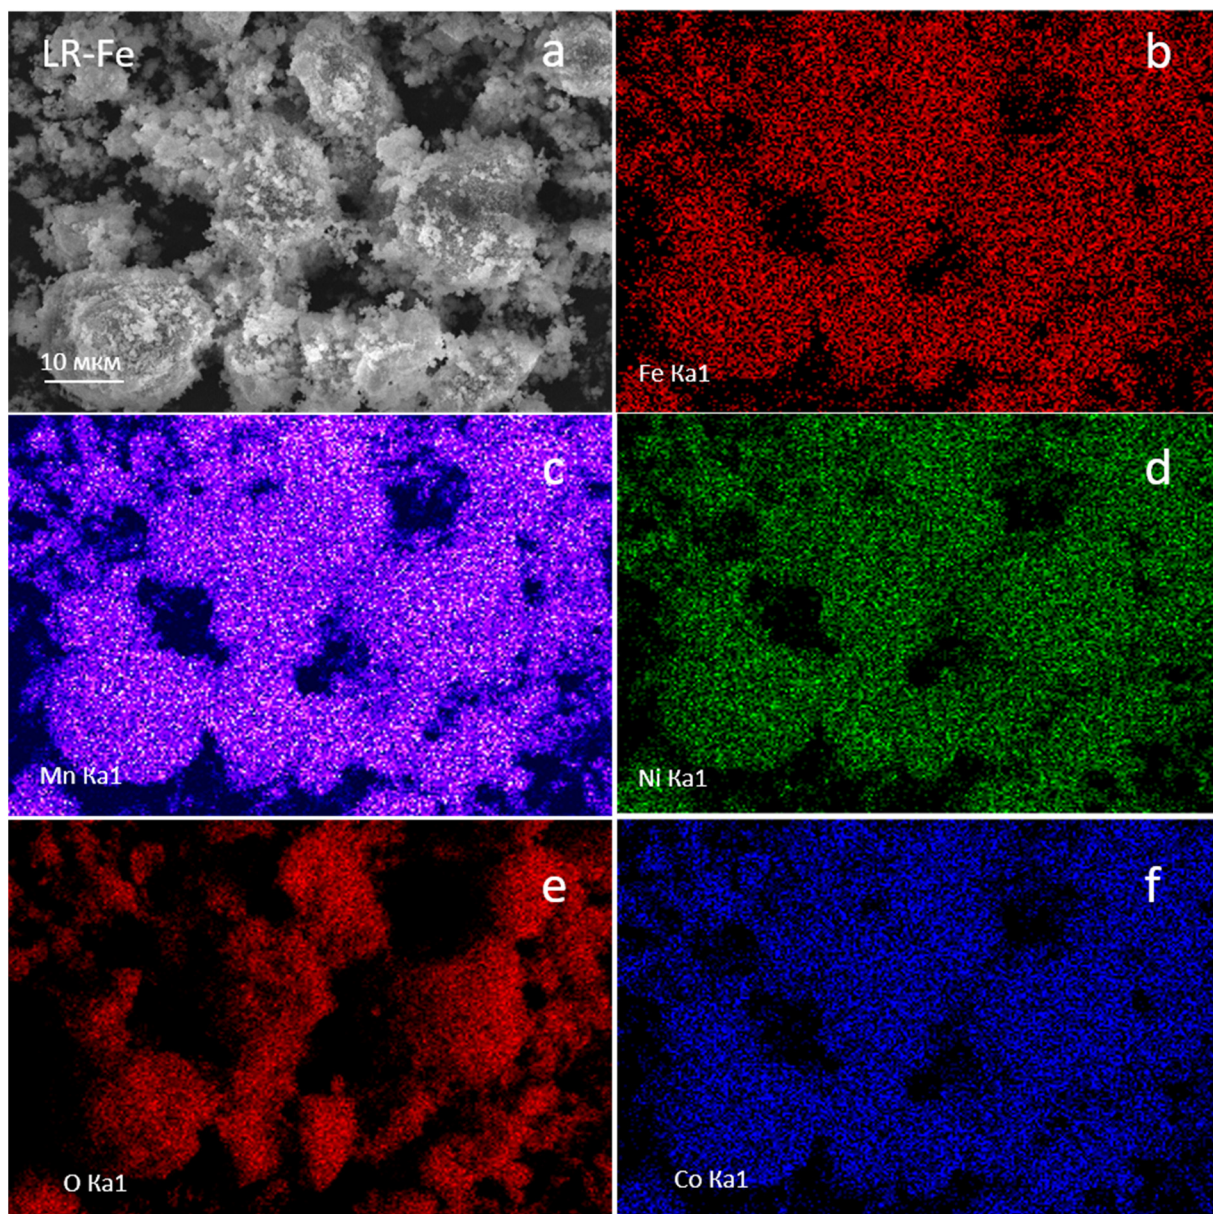

Figure S4. (a) SEM micrograph of LR – Fe sample and (b-f) element distribution maps: (b) Fe, (c) Mn, (d) Ni, (e) O, and (f) Co.

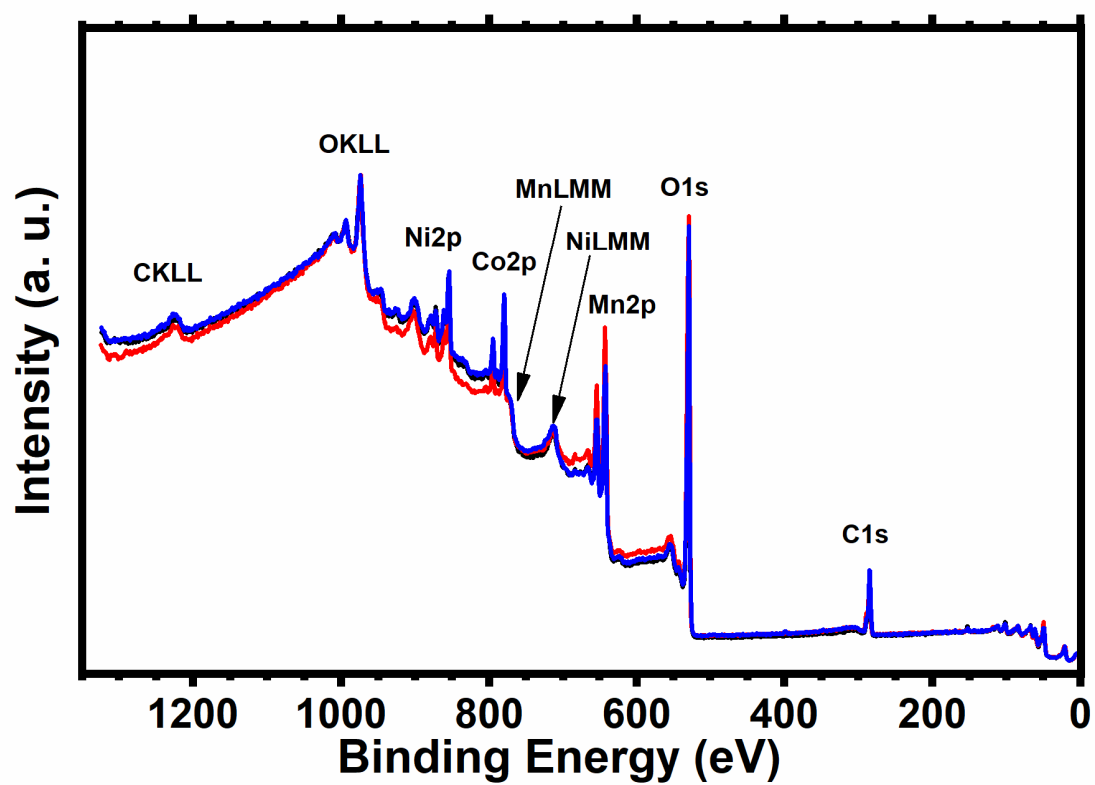

Figure S5. Survey XPS spectra of the samples LR, LR-Al and LR-Fe samples.

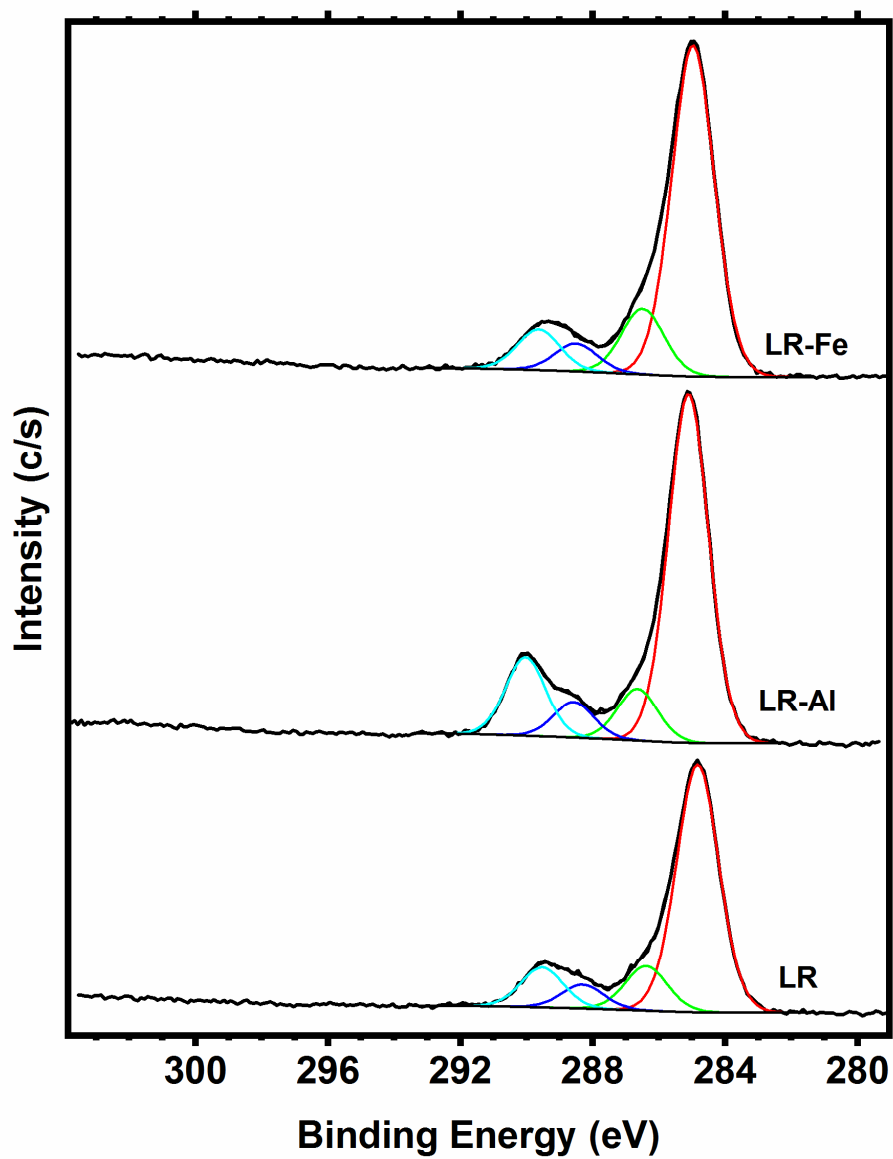

Figure S6. C1s spectra of LR, LR-Al and LR-Fe samples.

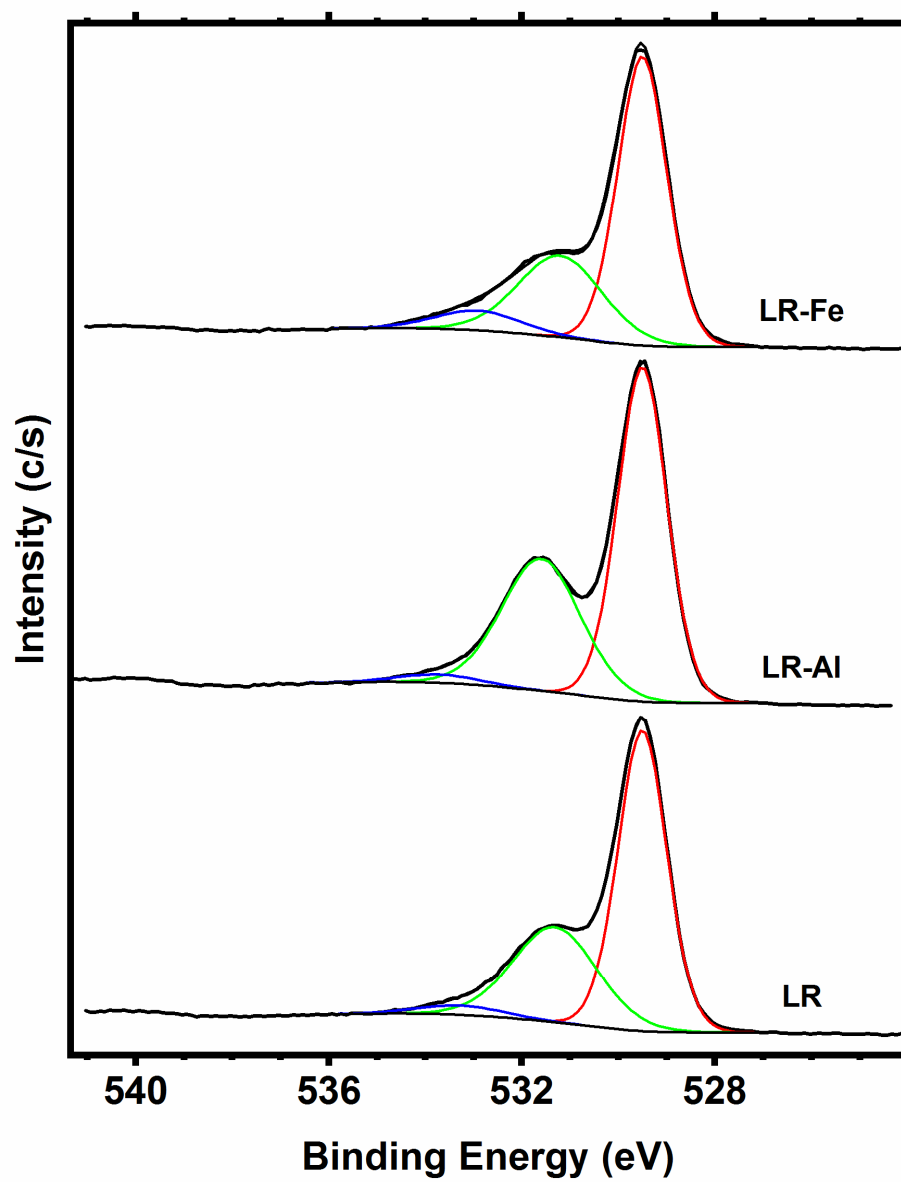

Figure S7. O1s spectra of LR, LR-Al and LR-Fe.

**Table S1.** Concentrations of elements on the surface of the studied samples (at %), calculated from the high-resolution XPS spectra

| Samples | Ni  | Co  | Mn   | O    | C    | Fe  | Al  |
|---------|-----|-----|------|------|------|-----|-----|
| LR      | 6.2 | 4.9 | 11.8 | 55.6 | 21.5 | –   | –   |
| LR-Al   | 4.7 | 2.9 | 11.8 | 54.9 | 25.1 | –   | 0.6 |
| LR-Fe   | 5.2 | 4.7 | 10.4 | 51.3 | 26.9 | 1.5 | –   |

**Table S2.** Binding energies of the Co2p<sub>3/2</sub> lines and the relative position of the satellite ( $\Delta$ Co2p<sub>sat</sub>) in the XPS spectra of the studied samples and reference cobalt compounds, eV.

| Samples                                                                                    | Co2p <sub>3/2</sub> | $\Delta$ Co2p <sub>sat</sub> | Ref. |
|--------------------------------------------------------------------------------------------|---------------------|------------------------------|------|
| LR                                                                                         | 780.0               | 9.6                          |      |
| LR-Al                                                                                      | 780.2               | 9.6                          |      |
| LR-Fe                                                                                      | 780.0               | 9.6                          |      |
| ScCo <sub>0.95</sub> Fe <sub>0.95</sub> O <sub>3</sub> (Co <sup>3+</sup> )                 | 780.2               | 10.2                         | [53] |
| Co(OH) <sub>2</sub> (Co <sup>2+</sup> )                                                    | 781.2               | 5.0                          | [54] |
| LiCoO <sub>2</sub> (Co <sup>3+</sup> )                                                     | 780.2               | 9.9                          | [55] |
| LiNi <sub>0.4</sub> Mn <sub>0.4</sub> Co <sub>0.2</sub> O <sub>2</sub> (Co <sup>3+</sup> ) | 780.2               | 9.5                          | [55] |
| LiCoO <sub>2</sub> (Co <sup>3+</sup> )                                                     | 779.6               | 8.6                          | [56] |
| Li <sub>0.5</sub> Co <sub>0.5</sub> Ni <sub>0.5</sub> O <sub>2</sub> (Co <sup>3+</sup> )   | 779.4               | 9.0                          | [56] |

**Table S3.** Binding energies of Mn2p<sub>3/2</sub> and Mn3s XPS spectra, relative satellite position ( $\Delta$ Mn2p<sub>sat</sub>) in Mn2p<sub>1/2</sub> XPS spectra, splitting ( $\Delta$ Mn3s) of Mn3s XPS spectra of the studied samples and reference manganese oxides, eV.

| Samples                                            | Mn2p <sub>3/2</sub> | $\Delta$ Mn2p <sub>sat</sub> | Mn3s | $\Delta$ Mn3s | O1s   | Ref.    |
|----------------------------------------------------|---------------------|------------------------------|------|---------------|-------|---------|
| LR                                                 | 642.1               | 11.4                         | 84.6 | 4.4           | 529.5 |         |
| LR-Al                                              | 642.1               | 11.4                         | 84.6 | 4.5           | 529.5 |         |
| LR-Fe                                              | 642.1               | 11.4                         | 84.7 | 4.3           | 529.5 |         |
| MnO (Mn <sup>2+</sup> )                            | 640.8               | ~6.0                         | 83.1 | 6.1           | 529.6 | [57,58] |
| Mn <sub>2</sub> O <sub>3</sub> (Mn <sup>3+</sup> ) | 641.8               | 10.1                         | 83.8 | 5.4           | 530.0 | [59]    |
| MnO <sub>2</sub> (Mn <sup>4+</sup> )               | 642.4               | 11.8                         | 84.7 | 4.4           | 529.6 | [60]    |
